# Supplementary material for: Network biology approach to epithelial–mesenchymal transition in cancer metastasis: three stage theory
Source: Oxford University Press journal article supplement (doi:10.1093/jmcb/mjv035), 2015-06-01
Supplement: mjv035_Supplementary_Data.zip [file mjv035_Supplementary_Data.zip]

## Supplementary Tables

### Supplementary Table S1: Gene expression profile data used for depicting the GRN-space landscape.

To depict the GRN-space landscape in the vicinity of epithelial and mesenchymal cellular states, we collected the gene expression profile data for both epithelial cell types and mesenchymal cell types from both the GEO database of NCBI and the ArrayExpress database of EBI, as follows.

| Database            | Dataset ID | Sample ID                                                                                                                           |
|---------------------|------------|-------------------------------------------------------------------------------------------------------------------------------------|
| NCBI GEO            | GSE32474   | GSM803648,GSM803707,GSM803765                                                                                                       |
| NCBI GEO            | GSE58605   | GSM1414981,GSM1414982,GSM1414983                                                                                                    |
| NCBI GEO            | GSE50832   | GSM1230054,GSM1230055,GSM1230056                                                                                                    |
| NCBI GEO            | GSE57083   | GSM1374389,GSM1374390                                                                                                               |
| NCBI GEO            | GSE25146   | GSM618009,GSM618010                                                                                                                 |
| NCBI GEO            | GSE50832   | GSM1230782,GSM1230783,GSM1230784,GSM1230728,GSM1230729,GSM1230730,GSM1230701,GSM1230702,GSM1230703,GSM1230045,GSM1230046,GSM1230047 |
| NCBI GEO            | GSE12548   | GSM315430,GSM315431,GSM315432<br>(Takahashi et al. 0h hour data for epithelium)                                                     |
| NCBI GEO            | GSE10315   | GSM260657,GSM260658,GSM260659,GSM260660,GSM260661,GSM260662                                                                         |
| EBI<br>ArrayExpress | E-MEXP-858 | 31mOhC,CW31M0hA,CW31M0hB                                                                                                            |
| NCBI GEO            | GSE24612   | GSM606843,GSM606844                                                                                                                 |
| NCBI GEO            | GSE9440    | GSM239829,GSM239830,GSM239831                                                                                                       |
| NCBI GEO            | GSE9832    | GSM248201,GSM248202,GSM248204,GSM248209,GSM248210,GSM248213,GSM248214                                                               |
| NCBI GEO            | GSE9865    | GSM249026,GSM249027                                                                                                                 |
| NCBI GEO            | GSE12583   | GSM315617,GSM315618                                                                                                                 |
| NCBI GEO            | GSE14897   | GSM372142,GSM372144,GSM372146                                                                                                       |
| NCBI GEO            | GSE18226   | GSM452726,GSM452730,GSM452734,GSM452735,GSM452736,GSM452737                                                                         |
| NCBI GEO            | GSE23583   | GSM579884,GSM579885,GSM579886,GSM579887,GSM579888,GSM579889,GSM579916,GSM579917,GSM579918                                           |
| NCBI GEO            | GSE12548   | GSM315446,GSM315447,GSM315448<br>(Takahashi et al. 60h hour data for mesenchyme)                                                    |

**Supplementary Table S2: Selected genes as coordinate variables of the GRN subspace for EMT representation.**

The 61 genes selected as coordinate variables of the GRN subspace for EMT are shown with gene symbols, gene IDs, medians of gene expression in the epithelial and mesenchymal states, as well as in Takahashi et al.'s experiment, together with gene descriptions by GENE of NCBI.

| Gene symbol      | gene ID        | Probeset ID  | medians of gene expression |                   |                                      |                                       | gene description by NCBI-GENE                           |
|------------------|----------------|--------------|----------------------------|-------------------|--------------------------------------|---------------------------------------|---------------------------------------------------------|
|                  |                |              | Epithelial cells           | Mesenchymal cells | Epithelial cells in Takahashi's data | Mesenchymal cells in Takahashi's data |                                                         |
| ANXA6            | 309            | 200982_s_at  | 37.4260                    | 52.8347           | 46.8544                              | 48.2881                               | annexin A6                                              |
| AP1S3            | 130340         | 1555733_s_at | 8.5412                     | 5.3509            | 7.4116                               | 7.5455                                | adaptor-related protein complex 1, sigma 3 subunit      |
| ARHGAP24         | 83478          | 223422_s_at  | 281.7597                   | 346.3200          | 309.6101                             | 304.9180                              | Rho GTPase activating protein 24                        |
| ARHGEF6          | 9459           | 209539_at    | 161.6140                   | 188.2597          | 164.0138                             | 157.3823                              | Rac/Cdc42 guanine nucleotide exchange factor (GEF) 6    |
| ARMCX1           | 51309          | 218694_at    | 235.0235                   | 279.9637          | 252.6424                             | 248.1394                              | armadillo repeat containing, X-linked 1                 |
| ASPM             | 259266         | 219918_s_at  | 271.3147                   | 326.8425          | 293.1746                             | 287.3387                              | asp (abnormal spindle) homolog, microcephaly associated |
| BAALC            | 79870          | 218899_s_at  | 237.9350                   | 287.6153          | 256.1527                             | 251.9426                              | brain and acute leukemia, cytoplasmic                   |
| BRI3BP           | 140707         | 225716_at    | 319.1979                   | 394.3695          | 346.7931                             | 344.0013                              | BRI3 binding protein                                    |
| C1QBP            | 708            | 208910_s_at  | 154.8503                   | 178.9144          | 155.1959                             | 148.5080                              | complement component 1, q subcomponent binding protein  |
| CBX5             | 23468          | 242069_at    | 419.2092                   | 520.7431          | 474.5275                             | 469.8778                              | chromobox homolog 5                                     |
| CCDC8            | 83987          | 223495_at    | 288.1611                   | 355.8931          | 315.2254                             | 310.4508                              | coiled-coil domain containing 8                         |
| CCNB1            | 891            | 228729_at    | 346.4732                   | 418.0904          | 375.6899                             | 371.5474                              | cyclin B1                                               |
| CKMT1A<br>CKMT1B | 548596<br>1159 | 202712_s_at  | 58.0337                    | 71.7168           | 64.1883                              | 64.7344                               | creatine kinase, mitochondrial 1A/1B                    |
| CLIP3            | 25999          | 235243_at    | 389.4957                   | 475.4569          | 430.2769                             | 428.4836                              | CAP-GLY domain containing linker protein 3              |
| CNN1             | 1264           | 203951_at    | 101.6034                   | 118.0456          | 105.0715                             | 101.6708                              | calponin 1, basic, smooth muscle                        |

|          |           |              |          |           |           |           |                                                                                            |
|----------|-----------|--------------|----------|-----------|-----------|-----------|--------------------------------------------------------------------------------------------|
| COL13A1  | 1305      | 211343_s_at  | 166.2316 | 197.73946 | 171.25018 | 166.4525  | collagen, type XIII, alpha 1                                                               |
| COL1A1   | 1277      | 1556499_s_at | 23.58415 | 28.831247 | 29.506765 | 27.679142 | collagen, type I, alpha 1                                                                  |
| DLC1     | 10395     | 224822_at    | 301.3462 | 376.18973 | 331.5045  | 327.61805 | DLC1 Rho GTPase activating protein                                                         |
| DSC2     | 1824      | 226817_at    | 334.9343 | 409.01804 | 366.38086 | 362.66517 | desmocollin 2                                                                              |
| ELTD1    | 535066    | 219134_at    | 246.4709 | 307.52796 | 272.82244 | 267.64738 | EGF, latrophilin and seven transmembrane domain containing 1 [ <i>Bos taurus</i> (cattle)] |
| ENPP1    | 5167      | 229088_at    | 361.0692 | 434.78203 | 389.13483 | 386.39138 | ectonucleotide pyrophosphatase/phosphodiesterase 1                                         |
| EVI2A    | 2123      | 204774_at    | 109.0613 | 132.74119 | 111.56038 | 107.54172 | ecotropic viral integration site 2A                                                        |
| FBN1     | 2200      | 235318_at    | 394.9006 | 485.97115 | 441.90635 | 439.11597 | fibrillin 1                                                                                |
| FN1      | 2335      | 212464_s_at  | 205.7143 | 240.9104  | 216.30998 | 212.40252 | fibronectin 1                                                                              |
| GABARAPL | 23710     | 211458_s_at  | 175.608  | 209.51139 | 181.68873 | 177.50342 | GABA(A) receptor-associated protein like 1                                                 |
| GAP43    | 2596      | 204471_at    | 104.3506 | 125.56808 | 107.27773 | 102.60365 | growth associated protein 43                                                               |
| HMMR     | 3161      | 207165_at    | 132.335  | 152.47542 | 133.4285  | 126.61648 | hyaluronan-mediated motility receptor (RHAMM)                                              |
| HPS3     | 84343     | 231121_at    | 386.1525 | 469.02192 | 424.8547  | 422.46928 | Hermansky-Pudlak syndrome 3                                                                |
| IFNLR1   | 163702    | 244261_at    | 426.0665 | 524.33658 | 482.47325 | 477.07232 | interferon, lambda receptor 1                                                              |
| KCND3    | 3752      | 213832_at    | 228.8653 | 268.37467 | 241.77789 | 236.72177 | potassium channel, voltage gated Shal related subfamily D, member 3                        |
| LIMS1    | 3987      |              |          |           |           |           | LIM and senescent cell antigen-like domains1/3/ 3-like                                     |
| LIMS3    | 96626     |              |          |           |           |           |                                                                                            |
| LIMS3L   | 100288695 | 223800_s_at  | 293.3617 | 364.48957 | 320.11373 | 316.37079 |                                                                                            |
| LRPPRC   | 10128     | 211971_s_at  | 188.8315 | 220.7098  | 193.52489 | 189.2244  | leucine-rich pentatricopeptide repeat containing                                           |
| LRRN4CL  | 221091    | 1556427_s_at | 14.54448 | 13.945574 | 14.961288 | 13.507702 | LRRN4 C-terminal like                                                                      |
| MAD2L1   | 4085      | 203362_s_at  | 92.11715 | 98.64707  | 91.755737 | 91.964449 | MAD2 mitotic arrest deficient-like 1                                                       |
| MIR222HG | 104457406 | 230127_at    | 377.4735 | 462.79759 | 418.01818 | 415.13376 | mir222 host gene                                                                           |
| NEGR1    | 257194    | 229461_x_at  | 371.3654 | 453.71036 | 411.15057 | 406.95643 | neuronal growth regulator 1                                                                |

|          |        |             |          |           |           |           |                                                                           |
|----------|--------|-------------|----------|-----------|-----------|-----------|---------------------------------------------------------------------------|
| NFATC4   | 4776   | 236270_at   | 404.1241 | 500.35345 | 453.97249 | 449.54891 | nuclear factor of activated T-cells, cytoplasmic, calcineurin-dependent 4 |
| NUP210   | 23225  | 212316_at   | 197.4709 | 226.28646 | 201.80165 | 197.0098  | nucleoporin 210kDa                                                        |
| PAXIP1   | 22976  | 212825_at   | 216.6102 | 250.06231 | 225.97912 | 221.72788 | PAX interacting (with transcription-activation domain) protein 1          |
| PBK      | 55872  | 219148_at   | 259.0917 | 317.4496  | 282.78675 | 277.63484 | PDZ binding kinase                                                        |
| PLSCR4   | 57088  | 218901_at   | 244.5695 | 298.12318 | 266.43027 | 261.34157 | scramblase 4                                                              |
| PRKG1    | 19091  | 207119_at   | 120.0464 | 142.98307 | 123.34144 | 116.5139  | protein kinase, cGMP-dependent, type I                                    |
| PTGER1   | 5731   | 207650_x_at | 136.9467 | 159.39237 | 137.61208 | 131.2176  | prostaglandin E receptor 1 (subtype EP1), 42kDa                           |
| PVRL3    | 25945  | 213325_at   | 223.8796 | 260.93221 | 236.71967 | 231.87038 | poliovirus receptor-related 3                                             |
| RCAN2    | 53901  | 203498_at   | 97.24311 | 107.70898 | 97.322378 | 95.658324 | regulator of calcineurin 2                                                |
| RHOJ     | 57381  | 238905_at   | 411.0583 | 514.92339 | 468.05213 | 463.27683 | ras homolog family member J                                               |
| SEPT11   | 55752  | 201307_at   | 48.74439 | 65.91386  | 58.23728  | 60.421052 | septin 11                                                                 |
| SESN3    | 143686 | 235684_s_at | 398.502  | 492.24572 | 446.11732 | 442.52997 | sestrin 3                                                                 |
| SH3PXD2A | 9644   | 207661_s_at | 141.1119 | 167.03443 | 143.62843 | 136.77832 | SH3 and PX domains 2A                                                     |
| SLC25A13 | 10165  | 229061_s_at | 356.4658 | 426.01638 | 383.78231 | 379.71565 | solute carrier family 25 (aspartate/glutamate carrier), member 13         |
| ST3GAL1  | 6482   | 225033_at   | 307.2061 | 385.22796 | 337.46985 | 335.02797 | ST3 beta-galactoside alpha-2,3-sialyltransferase 1                        |
| SYNE2    | 23124  | 202761_s_at | 68.01389 | 78.95854  | 72.358136 | 72.459103 | spectrin repeat containing, nuclear envelope 2                            |
| TCEA3    |        | 226388_at   | 325.2317 | 403.39433 | 354.17747 | 351.01143 | transcription elongation factor A (SII), 3                                |
| TIMELESS | 8914   | 203046_s_at | 79.00754 | 87.86439  | 80.795204 | 80.795945 | timeless circadian clock                                                  |
| TNC      | 3371   | 237169_at   | 406.5662 | 506.68457 | 457.12012 | 453.81697 | tenascin C                                                                |
| WNT5B    | 81029  | 221029_s_at | 275.8283 | 336.69402 | 303.20107 | 297.88832 | wingless-type MMTV integration site family, member 5B                     |
| XK       | 7504   | 206698_at   | 117.573  | 136.50863 | 117.92368 | 114.04674 | X-linked Kx blood group                                                   |

#### Remarks

1. Probe 202712\_s\_at corresponds to the two genes of CKMT1A and CKMT1B, together.

2. Probe223800\_s\_at corresponds to the three genes of LIMS1, LIMS3 and LIMS3L, together.
3. The gene expressions of several probes without gene symbols are eliminated (1560208\_at, 1560526\_at, 229456\_s\_at.) from the above list.
4. Gene IDs are those of Homo sapiens (human), except for the ELD1, which has no gene ID for Homo sapiens. Thus, we used the gene ID for Bos taurus (cattle) in the list.

## Supplementary Figure

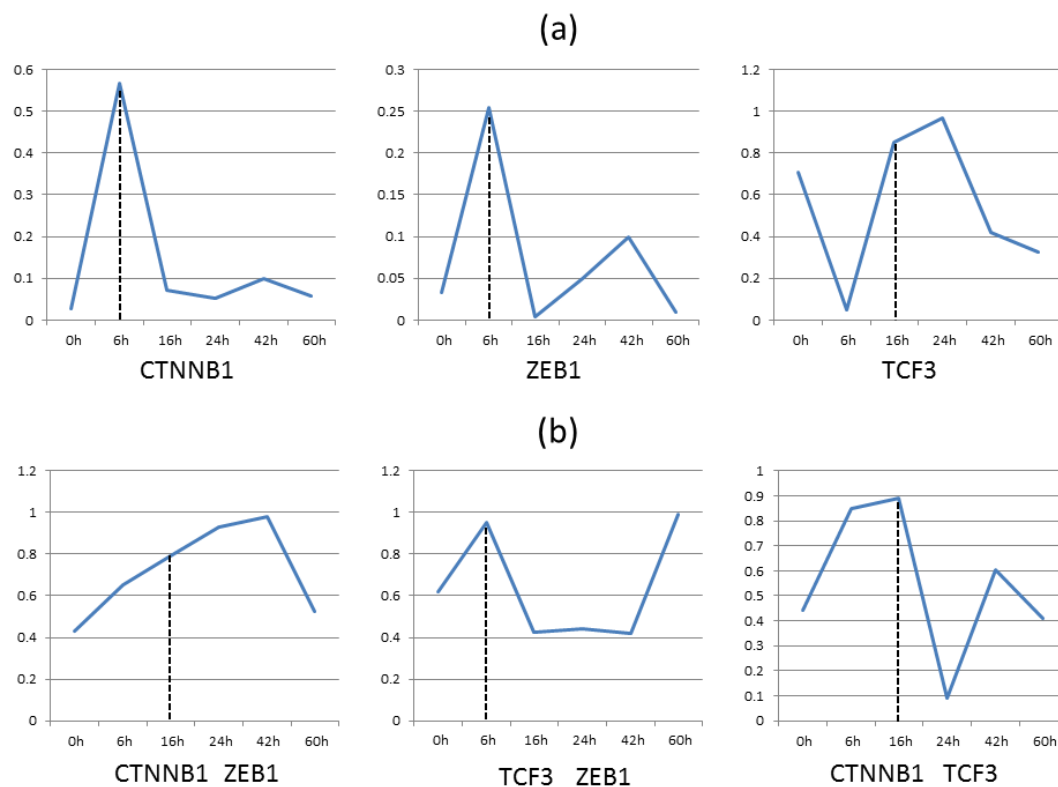

## Supplementary Figure S1

(a) The standard deviations and (b) absolute values of correlation coefficients among the expressions of TCF3, ZEB1, and CTNNB1.
